# Supplementary material for: Trapping of Small Molecules within Single or Double Cyclo[18]carbon Rings
Source: MDPI journal article supplement (doi:10.3390/molecules28052157), 2023-02-25
Supplement: s1 [file s1]

## SUPPLEMENTARY INFORMATION

# Trapping of Small Molecules within Single or Double Cyclo[18]carbon Rings

Natasza Trzęsowska <sup>1</sup>, Rafał Wysokiński <sup>1</sup>, Mariusz Michalczyk <sup>1,\*</sup>, Wiktor Zierkiewicz <sup>1,\*</sup> and Steve Scheiner <sup>2</sup>

<sup>1</sup> Faculty of Chemistry, Wrocław University of Science and Technology, Wybrzeże Wyspiańskiego 27, 50-370 Wrocław, Poland; [natasza.trzesowska@pwr.edu.pl](mailto:natasza.trzesowska@pwr.edu.pl) (N.T.); [rafal.wysokinski@pwr.edu.pl](mailto:rafal.wysokinski@pwr.edu.pl) (R.W.)

<sup>2</sup> Department of Chemistry and Biochemistry, Utah State University Logan, Logan, UT 84322, USA; [steve.scheiner@usu.edu](mailto:steve.scheiner@usu.edu)

\* Correspondence: [mariusz.michalczyk@pwr.edu.pl](mailto:mariusz.michalczyk@pwr.edu.pl) (M.M.); [wiktor.zierkiewicz@pwr.edu.pl](mailto:wiktor.zierkiewicz@pwr.edu.pl) (W.Z.)

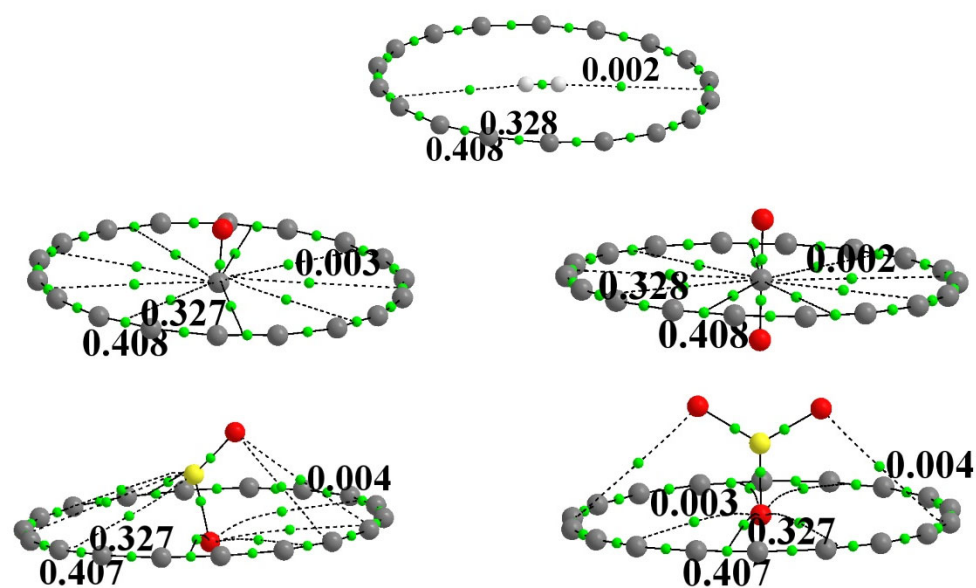

**Figure S1.** QTAIM molecular diagrams of  $C_{18}\cdots L$  ( $L = H_2, CO, CO_2, SO_2, SO_3$ ) dimers. Green dots represent bond critical points. Numbers refers to electron densities at BCPs (in au).

**Table S1.** AIM descriptors of the calculated complexes. Bond critical point (BCP) properties: electron density  $\rho$ , Laplacian of electron density  $\nabla^2\rho$  and total electron energy H and potential electron density energy V as well as kinetic electron density energy G, were obtained at the  $\omega$ B97XD/Def2TZVPP level. Data in atomic units.

|                                  | Interaction                    | $\rho$ | $\nabla^2\rho$ | H      | V      | G     |
|----------------------------------|--------------------------------|--------|----------------|--------|--------|-------|
| C <sub>18</sub> -H <sub>2</sub>  | C <sub>r</sub> -C <sub>r</sub> | 0.328  | -0.977         | -0.371 | -0.498 | 0.127 |
|                                  | C <sub>r</sub> ≡C <sub>r</sub> | 0.408  | -1.210         | -0.572 | -0.842 | 0.270 |
|                                  | H⋯C <sub>r</sub>               | 0.002  | 0.009          | 0.001  | -0.001 | 0.002 |
| C <sub>18</sub> -CO              | C <sub>r</sub> -C <sub>r</sub> | 0.327  | -0.977         | -0.371 | -0.498 | 0.127 |
|                                  | C <sub>r</sub> ≡C <sub>r</sub> | 0.408  | -1.208         | -0.572 | -0.841 | 0.270 |
|                                  | C <sub>r</sub> ⋯C              | 0.003  | 0.011          | 0.001  | -0.001 | 0.002 |
|                                  | C=O                            | 0.509  | 0.903          | -0.947 | -2.119 | 1.172 |
| C <sub>18</sub> -CO <sub>2</sub> | C <sub>r</sub> -C <sub>r</sub> | 0.408  | -1.208         | -0.572 | -0.842 | 0.270 |
|                                  | C <sub>r</sub> ≡C <sub>r</sub> | 0.328  | -0.977         | -0.371 | -0.498 | 0.127 |
|                                  | C <sub>r</sub> ⋯C              | 0.002  | 0.010          | 0.001  | -0.001 | 0.002 |
|                                  | C=O                            | 0.470  | 0.293          | -0.874 | -1.821 | 0.947 |
| C <sub>18</sub> -SO <sub>2</sub> | C <sub>r</sub> -C <sub>r</sub> | 0.327  | -0.976         | -0.371 | -0.498 | 0.127 |
|                                  | C <sub>r</sub> ≡C <sub>r</sub> | 0.408  | -1.207         | -0.572 | -0.841 | 0.270 |
|                                  | S=O                            | 0.308  | 1.240          | -0.349 | -1.008 | 0.659 |
|                                  | C <sub>r</sub> ⋯O              | 0.004  | 0.015          | 0.001  | -0.002 | 0.003 |
|                                  | C <sub>r</sub> ⋯S              | 0.004  | 0.015          | 0.001  | -0.002 | 0.003 |
| C <sub>18</sub> -SO <sub>3</sub> | C <sub>r</sub> -C <sub>r</sub> | 0.328  | -0.980         | -0.372 | -0.499 | 0.127 |
|                                  | C <sub>r</sub> ≡C <sub>r</sub> | 0.409  | -1.217         | -0.574 | -0.843 | 0.269 |
|                                  | S=O                            | 0.319  | 1.154          | -0.378 | -1.044 | 0.666 |
|                                  | C <sub>r</sub> ⋯O              | 0.003  | 0.012          | 0.001  | -0.001 | 0.002 |
|                                  | C <sub>r</sub> ⋯O'             | 0.004  | 0.018          | 0.001  | -0.002 | 0.003 |

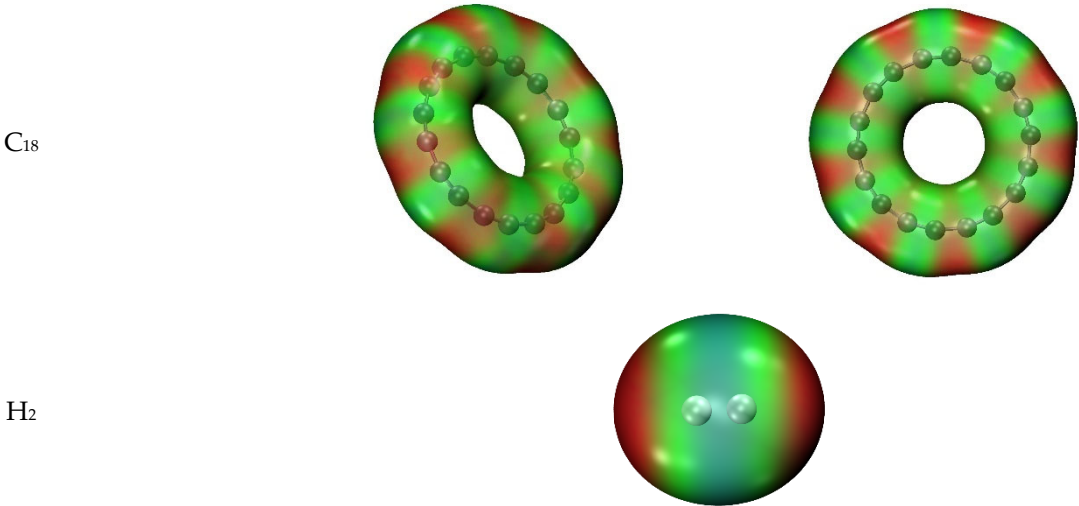

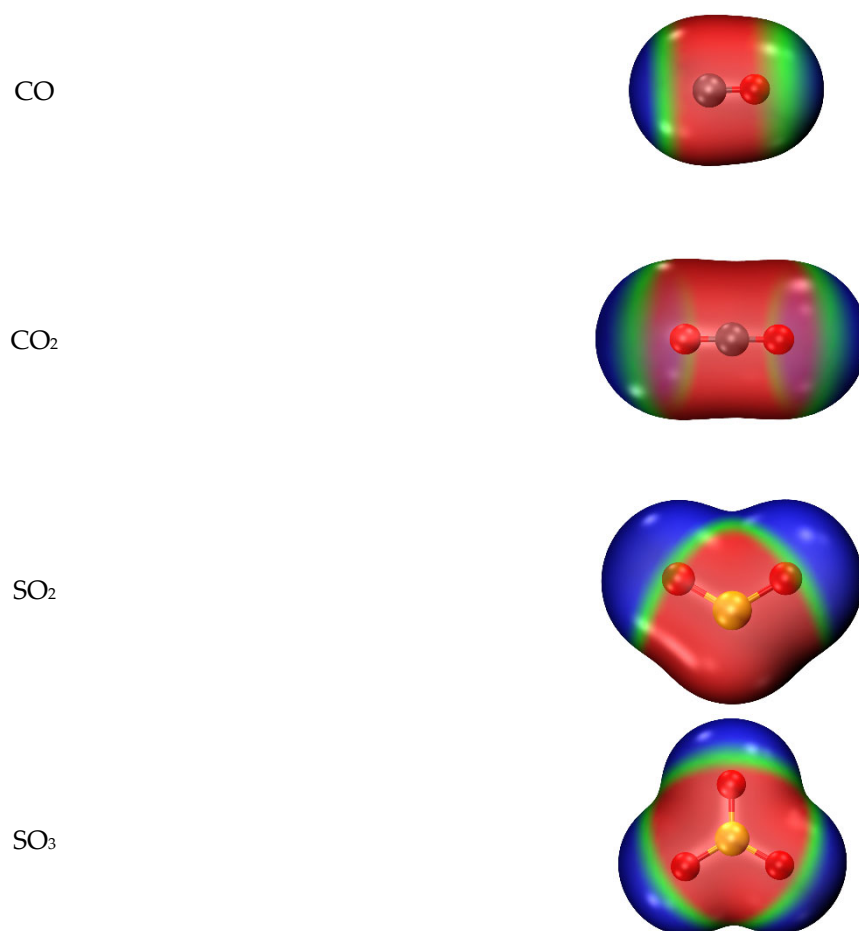

**Figure S2.** MEP of the monomers (C<sub>18</sub>, H<sub>2</sub>, CO, CO<sub>2</sub>, SO<sub>2</sub>, SO<sub>3</sub>) on the 0.001 au isodensity surface. Color scale is -0.10 au (blue) to 0.10 au (red).

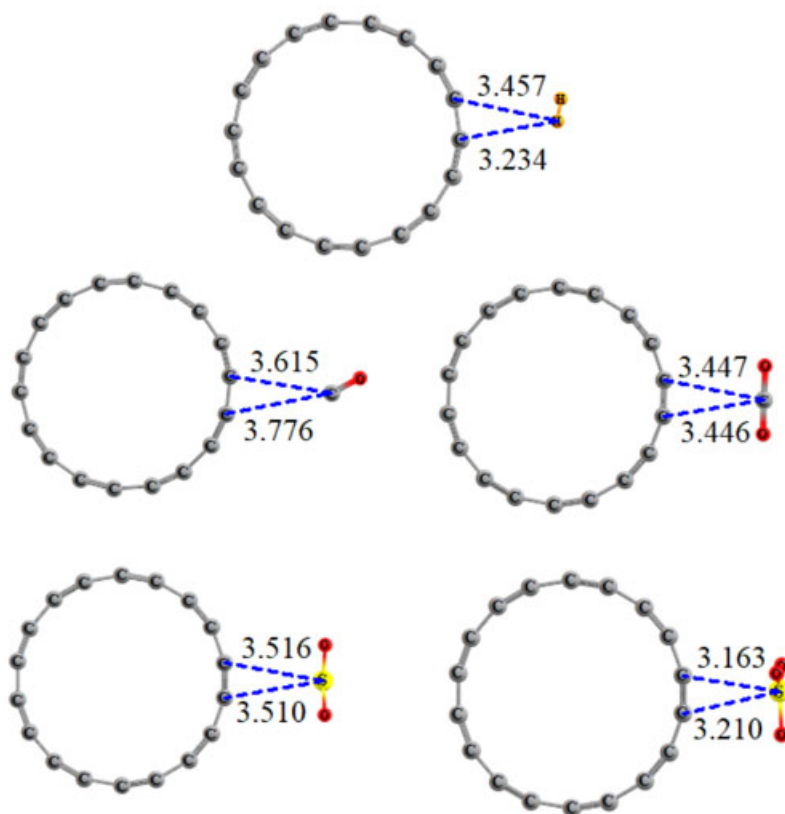

**Figure S3.** Geometries of complexes with ligands attached to the outside of the C<sub>18</sub> ring. Distances in Å.

**Table S2.** Binding energies (kcal/mol) of ligands attached to the outside of the C<sub>18</sub> ring, and barrier to convert from noncovalent to covalent.

|                 | noncovalent    | covalent       | transition state |
|-----------------|----------------|----------------|------------------|
| L               | E <sub>b</sub> | E <sub>b</sub> | E <sup>‡</sup>   |
| H <sub>2</sub>  | -0.31          | -64.46         | 135.46           |
| CO              | -0.50          | -7.13          | 25.81            |
| CO <sub>2</sub> | -1.15          | 1.72           | 47.47            |
| SO <sub>2</sub> | -1.70          | -15.14         | 31.48            |
| SO <sub>3</sub> | -2.88          | -33.62         | 8.09             |

| Covalent complexes                                                                  | $E_b$  | $E_{def}(C_{18})$ | $E_{def}(ligand)$ |
|-------------------------------------------------------------------------------------|--------|-------------------|-------------------|
| 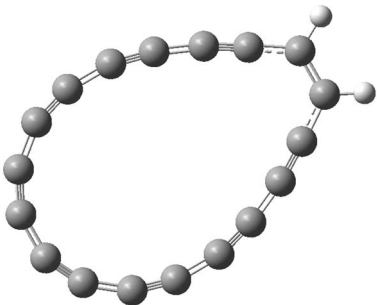   | -64.46 | 49.92             | 139.71            |
|    | -7.13  | 30.14             | 5.67              |
|   | 1.72   | 33.87             | 90.99             |
|  | -15.14 | 36.46             | 46.17             |
|  | -33.62 | 34.96             | 58.81             |

**Figure S4.** Covalent cyclo[18]carbon dimers with ligands along with their binding and deformation energies given in kcal/mol. Distances in Å.

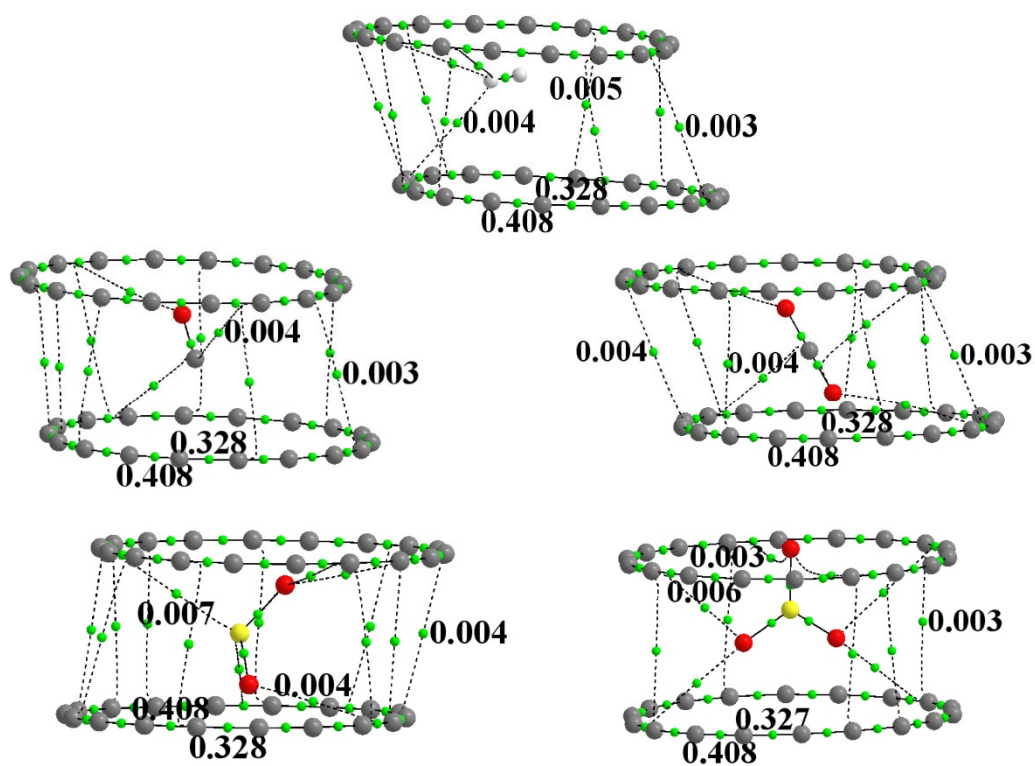

**Figure S5.** AIM molecular diagrams of  $(C_{18})_2 \cdots L$  complexes. Green dots represent bond critical points. Numbers refers to electron densities at BCPs (in au).

$(C_{18})_2-H_2$

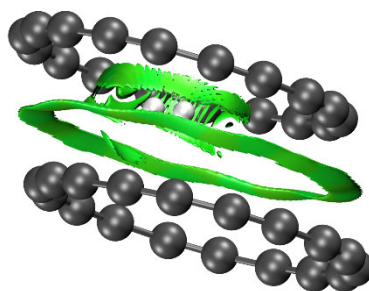

$(C_{18})_2-CO$

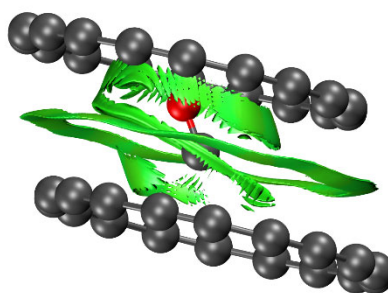

$(C_{18})_2-CO_2$

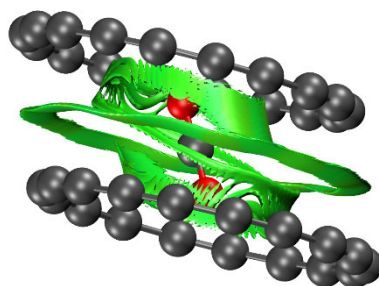

$(C_{18})_2-SO_2$

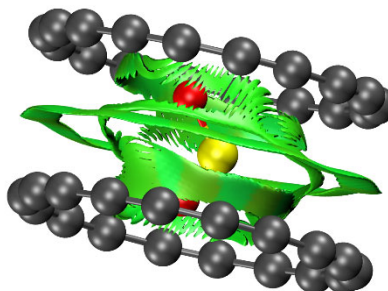

$(C_{18})_2-SO_3$

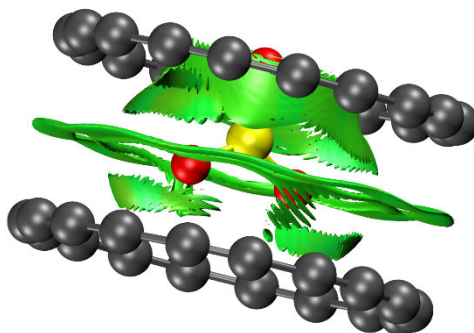

**Figure S6.** NCI isosurfaces of the  $(C_{18})_2-L$  (complexes at the RDG 0.5 au isovalue).

**Table S3.** Zero-point vibrational energies, and fully corrected interaction energies (kcal/mol).

| Dimer (one ring) |                  |      |                         | Trimer (two rings) |                  |      |                         |
|------------------|------------------|------|-------------------------|--------------------|------------------|------|-------------------------|
| L                | E <sub>int</sub> | ZPVE | E <sub>int</sub> (ZPVE) | L                  | E <sub>int</sub> | ZPVE | E <sub>int</sub> (ZPVE) |
| H <sub>2</sub>   | -1.48            | 0.81 | -0.67                   | H <sub>2</sub>     | -2.18            | 0.78 | -1.40                   |
| CO               | -2.84            | 0.35 | -2.49                   | CO                 | -4.3             | 0.39 | -3.91                   |
| CO <sub>2</sub>  | -4.12            | 1.28 | -2.84                   | CO <sub>2</sub>    | -6.27            | 1.34 | -4.93                   |
| SO <sub>2</sub>  | -4.50            | 0.33 | -4.17                   | SO <sub>2</sub>    | -7.48            | 0.15 | -7.33                   |
| SO <sub>3</sub>  | -4.81            | 0.39 | -4.42                   | SO <sub>3</sub>    | -7.37            | 0.75 | -6.62                   |



**Table S4.** Coordinates of studied systems:.a) Internal coordinates of  $\omega$ B97XD/Def2TZVPP optimized  $C_{18}$  and  $C_{18}$  dimer.

|              |   |           |           |           |
|--------------|---|-----------|-----------|-----------|
| $C_{18}$     | 6 | -4.815041 | 0.348934  | 0.057063  |
|              | 6 | -3.621235 | 0.125045  | 0.176823  |
|              | 6 | -2.289785 | 0.289707  | 0.089022  |
|              | 6 | -1.211979 | 0.794824  | -0.180808 |
|              | 6 | -5.955027 | 0.977577  | -0.278868 |
|              | 6 | -6.706347 | 1.825988  | -0.732042 |
|              | 6 | -0.311996 | 1.675717  | -0.651602 |
|              | 6 | -7.121451 | 2.953920  | -1.334596 |
|              | 6 | 0.145485  | 2.673645  | -1.184954 |
|              | 6 | -7.078405 | 4.029779  | -1.909312 |
|              | 6 | 0.192767  | 3.858708  | -1.818200 |
|              | 6 | -0.184212 | 4.882599  | -2.365160 |
|              | 6 | -6.574556 | 5.129257  | -2.496592 |
|              | 6 | -5.757403 | 5.928932  | -2.923725 |
|              | 6 | -1.011809 | 5.817257  | -2.864226 |
|              | 6 | -4.570306 | 6.485702  | -3.221032 |
|              | 6 | -2.046549 | 6.388199  | -3.169020 |
|              | 6 | -3.361587 | 6.634977  | -3.300738 |
| $(C_{18})_2$ | 6 | -0.505163 | -3.381409 | -0.763547 |
|              | 6 | 0.287898  | -4.303769 | -0.864930 |
|              | 6 | -0.988881 | -0.913150 | -0.536876 |
|              | 6 | -0.977523 | -2.129024 | -0.642755 |
|              | 6 | 4.961991  | 1.412912  | -0.753392 |
|              | 6 | 3.901034  | 2.003395  | -0.629485 |
|              | 6 | 2.579603  | 2.214911  | -0.506625 |
|              | 6 | 1.383362  | 1.984175  | -0.430875 |
|              | 6 | 0.229375  | 1.295574  | -0.409023 |
|              | 6 | -0.543461 | 0.351522  | -0.446521 |
|              | 6 | 1.458974  | -4.956240 | -0.960634 |
|              | 6 | 2.662232  | -5.150100 | -1.027820 |
|              | 6 | 3.981440  | -4.898334 | -1.081457 |
|              | 6 | 5.029594  | -4.273439 | -1.101551 |
|              | 6 | 5.879258  | -3.232012 | -1.089029 |
|              | 6 | 6.281947  | -2.080374 | -1.050668 |
|              | 6 | 5.835411  | 0.399384  | -0.880312 |
|              | 6 | 6.266689  | -0.738659 | -0.974294 |
|              | 6 | -0.374102 | -3.120819 | 2.707868  |
|              | 6 | 0.792719  | -3.772730 | 2.567705  |
|              | 6 | -1.638474 | -0.946532 | 2.931806  |
|              | 6 | -1.167427 | -2.200786 | 2.825921  |
|              | 6 | 3.244149  | 3.182581  | 2.910741  |
|              | 6 | 1.919845  | 3.397871  | 2.990146  |
|              | 6 | 0.721622  | 3.170139  | 3.035157  |
|              | 6 | -0.433812 | 2.483695  | 3.056131  |
|              | 6 | -1.207091 | 1.539479  | 3.047194  |
|              | 6 | -1.652161 | 0.272133  | 3.000465  |
|              | 6 | 1.992760  | -3.965048 | 2.454877  |
|              | 6 | 3.310327  | -3.712905 | 2.373736  |
|              | 6 | 4.359421  | -3.089201 | 2.354294  |
|              | 6 | 5.212356  | -2.051400 | 2.395082  |

|                                                                                                   |   |           |           |           |
|---------------------------------------------------------------------------------------------------|---|-----------|-----------|-----------|
|                                                                                                   | 6 | 5.619366  | -0.903708 | 2.478744  |
|                                                                                                   | 6 | 5.607209  | 0.434843  | 2.598019  |
|                                                                                                   | 6 | 4.306202  | 2.587317  | 2.823024  |
|                                                                                                   | 6 | 5.180494  | 1.572898  | 2.709821  |
| b) Internal coordinates of ωB97XD/Def2TZVPP optimized complexes with single ring (ligand within). |   |           |           |           |
| C <sub>18</sub> -H <sub>2</sub>                                                                   | 6 | -3.979871 | -0.102389 | 0.001924  |
|                                                                                                   | 6 | -2.644900 | -0.231672 | -0.089757 |
|                                                                                                   | 6 | -1.481652 | 0.038380  | -0.341551 |
|                                                                                                   | 6 | -0.407847 | 0.723963  | -0.770293 |
|                                                                                                   | 6 | -5.094814 | 0.385258  | -0.092296 |
|                                                                                                   | 6 | -6.068872 | 1.266304  | -0.379182 |
|                                                                                                   | 6 | 0.259007  | 1.626146  | -1.250614 |
|                                                                                                   | 6 | -6.614557 | 2.283636  | -0.775269 |
|                                                                                                   | 6 | 0.565864  | 2.806394  | -1.816039 |
|                                                                                                   | 6 | -6.772324 | 3.507673  | -1.308041 |
|                                                                                                   | 6 | 0.424168  | 3.917886  | -2.299784 |
|                                                                                                   | 6 | -0.178018 | 5.037924  | -2.735845 |
|                                                                                                   | 6 | -6.492647 | 4.579006  | -1.821268 |
|                                                                                                   | 6 | -5.757769 | 5.572363  | -2.350467 |
|                                                                                                   | 6 | -1.061699 | 5.838543  | -2.996422 |
|                                                                                                   | 6 | -4.783465 | 6.195706  | -2.739835 |
|                                                                                                   | 6 | -2.289522 | 6.375817  | -3.100445 |
|                                                                                                   | 6 | -3.501634 | 6.491416  | -3.016447 |
|                                                                                                   | 1 | -3.281962 | 2.792152  | -1.362856 |
|                                                                                                   | 1 | -2.915914 | 3.350595  | -1.690555 |
| C <sub>18</sub> -CO                                                                               | 6 | -4.882160 | 0.109678  | -0.136353 |
|                                                                                                   | 6 | -3.723012 | -0.263029 | -0.051547 |
|                                                                                                   | 6 | -2.382559 | -0.254540 | -0.152898 |
|                                                                                                   | 6 | -1.254358 | 0.133179  | -0.410809 |
|                                                                                                   | 6 | -5.940797 | 0.890183  | -0.414206 |
|                                                                                                   | 6 | -6.587844 | 1.848954  | -0.803746 |
|                                                                                                   | 6 | -0.258962 | 0.926413  | -0.843272 |
|                                                                                                   | 6 | -6.868086 | 3.053217  | -1.331385 |
|                                                                                                   | 6 | 0.311369  | 1.892612  | -1.323706 |
|                                                                                                   | 6 | -6.700069 | 4.148575  | -1.842885 |
|                                                                                                   | 6 | 0.496664  | 3.099769  | -1.885526 |
|                                                                                                   | 6 | 0.241886  | 4.193376  | -2.363794 |
|                                                                                                   | 6 | -6.071586 | 5.212513  | -2.372226 |
|                                                                                                   | 6 | -5.168199 | 5.933016  | -2.765183 |
|                                                                                                   | 6 | -0.470746 | 5.249535  | -2.792675 |
|                                                                                                   | 6 | -3.925386 | 6.359879  | -3.048735 |
|                                                                                                   | 6 | -1.431759 | 5.957982  | -3.045955 |
|                                                                                                   | 6 | -2.708351 | 6.368690  | -3.140314 |
|                                                                                                   | 6 | -3.213776 | 3.044662  | -1.676796 |
|                                                                                                   | 8 | -3.124520 | 3.482980  | -0.646699 |
| C <sub>18</sub> -CO <sub>2</sub>                                                                  | 6 | -5.008299 | 0.369070  | -0.073057 |
|                                                                                                   | 6 | -3.861170 | -0.032054 | 0.039363  |
|                                                                                                   | 6 | -2.520393 | -0.064498 | -0.049362 |
|                                                                                                   | 6 | -1.379446 | 0.279881  | -0.312269 |
|                                                                                                   | 6 | -6.042219 | 1.165587  | -0.394130 |
|                                                                                                   | 6 | -6.657625 | 2.124749  | -0.830963 |
|                                                                                                   | 6 | -0.359305 | 1.026235  | -0.769270 |

|                                  |    |           |           |           |
|----------------------------------|----|-----------|-----------|-----------|
|                                  | 6  | -6.898666 | 3.312275  | -1.412482 |
|                                  | 6  | 0.242475  | 1.954267  | -1.285131 |
|                                  | 6  | -6.693672 | 4.379241  | -1.968443 |
|                                  | 6  | 0.466667  | 3.130127  | -1.896267 |
|                                  | 6  | 0.248262  | 4.208570  | -2.424254 |
|                                  | 6  | -6.031885 | 5.401470  | -2.537295 |
|                                  | 6  | -5.104825 | 6.078271  | -2.951972 |
|                                  | 6  | -0.430308 | 5.264398  | -2.905123 |
|                                  | 6  | -3.849057 | 6.458986  | -3.242675 |
|                                  | 6  | -1.367955 | 5.988643  | -3.198079 |
|                                  | 6  | -2.631570 | 6.429507  | -3.322622 |
|                                  | 8  | -3.148738 | 3.717308  | -0.614183 |
|                                  | 8  | -3.304991 | 2.673999  | -2.671089 |
|                                  | 6  | -3.226920 | 3.195774  | -1.642697 |
|                                  | 6  | -5.035052 | 0.450242  | 0.013888  |
|                                  | 6  | -3.883933 | 0.056203  | 0.115442  |
| C <sub>18</sub> -SO <sub>2</sub> | 6  | -2.542798 | 0.009513  | 0.034343  |
|                                  | 6  | -1.399656 | 0.352852  | -0.220947 |
|                                  | 6  | -6.074394 | 1.246850  | -0.292347 |
|                                  | 6  | -6.706125 | 2.203545  | -0.712204 |
|                                  | 6  | -0.362635 | 1.085276  | -0.660982 |
|                                  | 6  | -6.958975 | 3.394485  | -1.283477 |
|                                  | 6  | 0.243867  | 2.012912  | -1.171250 |
|                                  | 6  | -6.757719 | 4.463376  | -1.837896 |
|                                  | 6  | 0.464692  | 3.187807  | -1.783930 |
|                                  | 6  | 0.237619  | 4.262442  | -2.315302 |
|                                  | 6  | -6.088466 | 5.479211  | -2.411298 |
|                                  | 6  | -5.150327 | 6.138346  | -2.830788 |
|                                  | 6  | -0.463831 | 5.302602  | -2.796659 |
|                                  | 6  | -3.890078 | 6.501743  | -3.128004 |
|                                  | 6  | -1.405083 | 6.021734  | -3.091307 |
|                                  | 6  | -2.672745 | 6.453845  | -3.208535 |
| C <sub>18</sub> -SO <sub>3</sub> | 8  | -3.082922 | 3.410485  | -1.193903 |
|                                  | 8  | -2.531086 | 2.187805  | -3.253133 |
|                                  | 16 | -3.499992 | 2.840530  | -2.433712 |
|                                  | 6  | -4.978282 | 0.257410  | 0.044026  |
|                                  | 6  | -3.707638 | -0.168251 | 0.147225  |
|                                  | 6  | -2.490227 | -0.155505 | 0.065495  |
|                                  | 6  | -1.255273 | 0.300206  | -0.204376 |
|                                  | 6  | -5.931793 | 0.974164  | -0.214764 |
|                                  | 6  | -6.638227 | 2.030972  | -0.652838 |
|                                  | 6  | -0.371180 | 1.052570  | -0.580694 |
|                                  | 6  | -6.905072 | 3.115473  | -1.146104 |
|                                  | 6  | 0.217451  | 2.146985  | -1.093208 |
|                                  | 6  | -6.753423 | 4.314936  | -1.734466 |
|                                  | 6  | 0.360044  | 3.249014  | -1.599002 |
|                                  | 6  | 0.066620  | 4.443737  | -2.142075 |
|                                  | 6  | -6.213584 | 5.284514  | -2.242754 |
|                                  | 6  | -5.246622 | 6.097082  | -2.702064 |
|                                  | 6  | -0.578388 | 5.389295  | -2.566906 |
|                                  | 6  | -4.125561 | 6.502836  | -2.961993 |
|                                  | 6  | -1.625828 | 6.161974  | -2.902793 |

|                                                                                                                         |    |             |             |             |
|-------------------------------------------------------------------------------------------------------------------------|----|-------------|-------------|-------------|
|                                                                                                                         | 6  | -2.783842   | 6.524136    | -3.033437   |
|                                                                                                                         | 8  | -3.274661   | 3.229509    | -1.367976   |
|                                                                                                                         | 8  | -3.379308   | 5.219131    | 0.062621    |
|                                                                                                                         | 8  | -2.840981   | 3.038716    | 1.038603    |
|                                                                                                                         | 16 | -3.164694   | 3.828639    | -0.090315   |
| c) Internal coordinates of $\omega$ B97XD/Def2TZVPP optimized complexes with single ring (ligand from the outer side)). |    |             |             |             |
| C <sub>18</sub> -H <sub>2</sub>                                                                                         | C  | -3.86941500 | 0.03220400  | 0.04750600  |
|                                                                                                                         | C  | -2.54471800 | -0.16094300 | -0.07720700 |
|                                                                                                                         | C  | -1.37745600 | 0.04842800  | -0.36576500 |
|                                                                                                                         | C  | -0.28543900 | 0.67456300  | -0.83811800 |
|                                                                                                                         | C  | -4.96214500 | 0.57059100  | -0.02792200 |
|                                                                                                                         | C  | -5.89973400 | 1.49234800  | -0.30886100 |
|                                                                                                                         | C  | 0.40986700  | 1.53391000  | -1.35547500 |
|                                                                                                                         | C  | -6.40680400 | 2.52639100  | -0.71292300 |
|                                                                                                                         | C  | 0.75765400  | 2.68636900  | -1.95443200 |
|                                                                                                                         | C  | -6.51881700 | 3.74564000  | -1.26837600 |
|                                                                                                                         | C  | 0.65473600  | 3.79319300  | -2.45831400 |
|                                                                                                                         | C  | 0.09688600  | 4.93228600  | -2.90397400 |
|                                                                                                                         | C  | -6.20293000 | 4.79154700  | -1.81230500 |
|                                                                                                                         | C  | -5.43686200 | 5.73800900  | -2.38240200 |
|                                                                                                                         | C  | -0.75361100 | 5.76953300  | -3.15914800 |
|                                                                                                                         | C  | -4.44582600 | 6.30663400  | -2.81151200 |
|                                                                                                                         | C  | -1.95745300 | 6.36246900  | -3.24280800 |
|                                                                                                                         | C  | -3.15995800 | 6.53748000  | -3.12925500 |
|                                                                                                                         | H  | 3.54269300  | 5.19875900  | -2.83212400 |
|                                                                                                                         | H  | 3.43700300  | 5.87129000  | -3.13062000 |
| C <sub>18</sub> -CO                                                                                                     | C  | -4.94003900 | 0.17607800  | -0.18116300 |
|                                                                                                                         | C  | -3.78242800 | -0.20016200 | -0.09030200 |
|                                                                                                                         | C  | -2.44148500 | -0.19823100 | -0.18402600 |
|                                                                                                                         | C  | -1.30799400 | 0.17878100  | -0.43463300 |
|                                                                                                                         | C  | -5.99261600 | 0.96215700  | -0.46658400 |
|                                                                                                                         | C  | -6.63671800 | 1.92154700  | -0.85961300 |
|                                                                                                                         | C  | -0.30516400 | 0.96545700  | -0.86307500 |
|                                                                                                                         | C  | -6.90731100 | 3.12706300  | -1.38989000 |
|                                                                                                                         | C  | 0.27217100  | 1.92866800  | -1.34120800 |
|                                                                                                                         | C  | -6.73373600 | 4.22141600  | -1.90167700 |
|                                                                                                                         | C  | 0.46377300  | 3.13458300  | -1.90378900 |
|                                                                                                                         | C  | 0.21383300  | 4.22841100  | -2.38361200 |
|                                                                                                                         | C  | -6.09640800 | 5.28166300  | -2.42838200 |
|                                                                                                                         | C  | -5.18729900 | 5.99717500  | -2.81717100 |
|                                                                                                                         | C  | -0.49400000 | 5.28628000  | -2.81644400 |
|                                                                                                                         | C  | -3.94044000 | 6.41714800  | -3.09426000 |
|                                                                                                                         | C  | -1.44834100 | 6.00114400  | -3.07683600 |
|                                                                                                                         | C  | -2.72282800 | 6.41745900  | -3.17796400 |
|                                                                                                                         | C  | 3.86817200  | 1.56820900  | -1.43863000 |
|                                                                                                                         | O  | 4.69950300  | 0.86047000  | -1.17639000 |
| C <sub>18</sub> -CO <sub>2</sub>                                                                                        | C  | -5.11209000 | 0.37738400  | -0.06768100 |
|                                                                                                                         | C  | -3.98708400 | -0.07382400 | 0.07441700  |
|                                                                                                                         | C  | -2.64689900 | -0.16662700 | 0.01763500  |
|                                                                                                                         | C  | -1.48588000 | 0.12475000  | -0.21994300 |
|                                                                                                                         | C  | -6.10203600 | 1.21766000  | -0.41669700 |
|                                                                                                                         | C  | -6.66501200 | 2.20050200  | -0.87115600 |

|                                  |   |             |             |             |
|----------------------------------|---|-------------|-------------|-------------|
|                                  | C | -0.42308200 | 0.82377300  | -0.65569300 |
|                                  | C | -6.84185200 | 3.39492500  | -1.46269600 |
|                                  | C | 0.23089900  | 1.72181000  | -1.16036400 |
|                                  | C | -6.57989800 | 4.44980600  | -2.01772000 |
|                                  | C | 0.51728100  | 2.88514600  | -1.77121500 |
|                                  | C | 0.35670000  | 3.96962000  | -2.30824500 |
|                                  | C | -5.86057800 | 5.43982500  | -2.57476500 |
|                                  | C | -4.89571700 | 6.07386800  | -2.97030200 |
|                                  | C | -0.26138800 | 5.05355700  | -2.80975600 |
|                                  | C | -3.61672200 | 6.39588700  | -3.23188000 |
|                                  | C | -1.16087200 | 5.81480900  | -3.12644800 |
|                                  | C | -2.40029800 | 6.31202900  | -3.28307600 |
|                                  | O | 3.94218400  | 2.67835100  | -1.96681900 |
|                                  | O | 3.64031200  | 4.72638600  | -2.99567700 |
|                                  | C | 3.78856900  | 3.70214900  | -2.48088000 |
| C <sub>18</sub> -SO <sub>2</sub> | C | -4.65459200 | 0.54600100  | 0.41692800  |
|                                  | C | -3.49047800 | 0.18019300  | 0.39886800  |
|                                  | C | -2.17318900 | 0.17958200  | 0.12969200  |
|                                  | C | -1.08915500 | 0.53394900  | -0.30392800 |
|                                  | C | -5.74920900 | 1.29378700  | 0.19256000  |
|                                  | C | -6.44849700 | 2.20809900  | -0.21282300 |
|                                  | C | -0.16895600 | 1.28064300  | -0.93943500 |
|                                  | C | -6.80696800 | 3.35073500  | -0.82405200 |
|                                  | C | 0.32602100  | 2.19062500  | -1.58610200 |
|                                  | C | -6.71585200 | 4.38639600  | -1.46315100 |
|                                  | C | 0.43100300  | 3.33064400  | -2.29155100 |
|                                  | C | 0.10389500  | 4.36715400  | -2.84591900 |
|                                  | C | -6.17112000 | 5.38858000  | -2.17487900 |
|                                  | C | -5.33225000 | 6.06287100  | -2.75022300 |
|                                  | C | -0.66550400 | 5.37545700  | -3.29220000 |
|                                  | C | -4.13908700 | 6.45568500  | -3.22951700 |
|                                  | C | -1.66019800 | 6.05277900  | -3.49487300 |
|                                  | C | -2.94318400 | 6.45418500  | -3.47276400 |
|                                  | O | 2.60720300  | -1.05459500 | -0.91229400 |
|                                  | O | 3.56827400  | 0.73489600  | -2.29539700 |
|                                  | S | 3.18976000  | 0.24432200  | -1.01005000 |
| C <sub>18</sub> -SO <sub>3</sub> | C | -4.98726300 | 0.28394300  | -0.00370100 |
|                                  | C | -3.71159100 | -0.12958900 | 0.09417300  |
|                                  | C | -2.49413100 | -0.12965300 | 0.01163700  |
|                                  | C | -1.24983500 | 0.29896400  | -0.26398100 |
|                                  | C | -5.94300900 | 0.99885300  | -0.25764100 |
|                                  | C | -6.65083300 | 2.06003000  | -0.68282600 |
|                                  | C | -0.33682800 | 1.01340100  | -0.64452100 |
|                                  | C | -6.90024800 | 3.15731500  | -1.15482800 |
|                                  | C | 0.29028500  | 2.08345700  | -1.16398600 |
|                                  | C | -6.70777700 | 4.36794600  | -1.70733900 |
|                                  | C | 0.47500300  | 3.17988900  | -1.66541100 |
|                                  | C | 0.18974600  | 4.38764200  | -2.18427400 |
|                                  | C | -6.13458200 | 5.33702800  | -2.17777400 |
|                                  | C | -5.13175000 | 6.12794600  | -2.59831500 |
|                                  | C | -0.45075800 | 5.35354100  | -2.57143300 |
|                                  | C | -4.00277200 | 6.51731800  | -2.84834800 |

|                                                                                                            |   |             |            |             |
|------------------------------------------------------------------------------------------------------------|---|-------------|------------|-------------|
|                                                                                                            | C | -1.50248100 | 6.14432500 | -2.85203800 |
|                                                                                                            | C | -2.66104700 | 6.51530600 | -2.93883500 |
|                                                                                                            | O | 3.25256000  | 5.30886100 | -2.80570100 |
|                                                                                                            | O | 2.00501100  | 6.52029700 | -4.53361100 |
|                                                                                                            | O | 2.17050300  | 7.44182500 | -2.26777500 |
|                                                                                                            | S | 2.46163200  | 6.41556200 | -3.19801000 |
| d) Internal coordinates of ωB97XD/Def2TZVPP optimized covalent complexes with single ring (ligand within). |   |             |            |             |
| C <sub>18</sub> -H <sub>2</sub>                                                                            | 6 | -4.191998   | 0.329990   | -0.176284   |
|                                                                                                            | 6 | -2.855539   | 0.419579   | -0.351684   |
|                                                                                                            | 6 | -1.729353   | 0.781656   | -0.628206   |
|                                                                                                            | 6 | -0.566071   | 1.363121   | -1.005947   |
|                                                                                                            | 6 | -5.384138   | 0.573056   | -0.163912   |
|                                                                                                            | 6 | -6.517911   | 1.280261   | -0.364254   |
|                                                                                                            | 6 | 0.382315    | 2.012317   | -1.388647   |
|                                                                                                            | 6 | -7.179707   | 2.237171   | -0.723919   |
|                                                                                                            | 6 | 1.444825    | 2.809190   | -1.845369   |
|                                                                                                            | 6 | -7.331738   | 3.469549   | -1.258318   |
|                                                                                                            | 6 | 1.293276    | 4.041141   | -2.381129   |
|                                                                                                            | 6 | 0.053965    | 4.680415   | -2.549095   |
|                                                                                                            | 6 | -6.912525   | 4.497303   | -1.759352   |
|                                                                                                            | 6 | -5.969953   | 5.342203   | -2.231896   |
|                                                                                                            | 6 | -1.036935   | 5.193049   | -2.669636   |
|                                                                                                            | 6 | -4.855854   | 5.736931   | -2.520827   |
|                                                                                                            | 6 | -2.323001   | 5.613707   | -2.724914   |
|                                                                                                            | 6 | -3.519147   | 5.824067   | -2.695347   |
|                                                                                                            | 1 | 2.445328    | 2.403285   | -1.757731   |
|                                                                                                            | 1 | 2.177756    | 4.576929   | -2.703554   |
| C <sub>18</sub> -CO                                                                                        | 6 | -4.322154   | -0.508354  | -0.214409   |
|                                                                                                            | 6 | -2.974016   | -0.434462  | -0.217232   |
|                                                                                                            | 6 | -1.864763   | 0.045960   | -0.355625   |
|                                                                                                            | 6 | -0.867833   | 0.916839   | -0.621978   |
|                                                                                                            | 6 | -5.470155   | -0.128227  | -0.354962   |
|                                                                                                            | 6 | -6.456411   | 0.744485   | -0.653448   |
|                                                                                                            | 6 | -0.246985   | 1.913484   | -0.935080   |
|                                                                                                            | 6 | -6.935845   | 1.807233   | -1.004048   |
|                                                                                                            | 6 | 0.157705    | 3.143045   | -1.327373   |
|                                                                                                            | 6 | -6.955087   | 3.090999   | -1.421756   |
|                                                                                                            | 6 | 0.274045    | 4.291077   | -1.698376   |
|                                                                                                            | 6 | 0.151162    | 5.601486   | -2.125601   |
|                                                                                                            | 6 | -6.529197   | 4.176272   | -1.769916   |
|                                                                                                            | 6 | -5.687332   | 5.184621   | -2.082459   |
|                                                                                                            | 6 | -0.846083   | 6.484377   | -2.428559   |
|                                                                                                            | 6 | -4.686039   | 5.844223   | -2.280404   |
|                                                                                                            | 6 | -2.229332   | 6.507355   | -2.458483   |
|                                                                                                            | 6 | -3.425350   | 6.315696   | -2.413885   |
|                                                                                                            | 6 | 0.514482    | 6.923158   | -2.548993   |
|                                                                                                            | 8 | 1.327321    | 7.753197   | -2.806423   |
| C <sub>18</sub> -CO <sub>2</sub>                                                                           | 6 | -4.411051   | -0.303574  | -0.189034   |
|                                                                                                            | 6 | -3.200096   | -0.180071  | -0.209889   |
|                                                                                                            | 6 | -1.981336   | 0.369370   | -0.384495   |
|                                                                                                            | 6 | -1.039941   | 1.097700   | -0.633257   |
|                                                                                                            | 6 | -5.722468   | -0.017872  | -0.321106   |

|                                  |    |           |           |           |
|----------------------------------|----|-----------|-----------|-----------|
|                                  | 6  | -6.674265 | 0.689547  | -0.600746 |
|                                  | 6  | -0.221718 | 2.111498  | -0.986156 |
|                                  | 6  | -7.324096 | 1.794882  | -1.019413 |
|                                  | 6  | 0.372128  | 3.107678  | -1.341241 |
|                                  | 6  | -7.372008 | 2.937763  | -1.439538 |
|                                  | 6  | 0.768920  | 4.356068  | -1.790835 |
|                                  | 6  | 0.117234  | 5.478595  | -2.213372 |
|                                  | 6  | -6.921366 | 4.133777  | -1.869433 |
|                                  | 6  | -6.102745 | 4.985702  | -2.164543 |
|                                  | 6  | -1.210051 | 5.835438  | -2.371078 |
|                                  | 6  | -4.940811 | 5.635661  | -2.378698 |
|                                  | 6  | -2.411972 | 5.978781  | -2.449934 |
|                                  | 6  | -3.761923 | 5.923852  | -2.458162 |
|                                  | 8  | 2.057998  | 7.012886  | -2.731051 |
|                                  | 6  | 1.485291  | 6.052405  | -2.394388 |
|                                  | 8  | 2.068706  | 4.810834  | -1.930879 |
| C <sub>18</sub> -SO <sub>2</sub> | 6  | -4.553354 | -0.654066 | -0.253337 |
|                                  | 6  | -3.205727 | -0.589419 | -0.231151 |
|                                  | 6  | -2.102287 | -0.087885 | -0.344926 |
|                                  | 6  | -1.107490 | 0.790300  | -0.589252 |
|                                  | 6  | -5.696249 | -0.264808 | -0.415117 |
|                                  | 6  | -6.622772 | 0.663355  | -0.734836 |
|                                  | 6  | -0.472543 | 1.786767  | -0.876330 |
|                                  | 6  | -7.038857 | 1.752100  | -1.088142 |
|                                  | 6  | -0.017328 | 3.004571  | -1.245107 |
|                                  | 6  | -6.923421 | 3.037054  | -1.485045 |
|                                  | 6  | 0.194938  | 4.149601  | -1.586594 |
|                                  | 6  | 0.287753  | 5.458776  | -2.013019 |
|                                  | 6  | -6.416598 | 4.098286  | -1.797266 |
|                                  | 6  | -5.487968 | 5.041858  | -2.060216 |
|                                  | 6  | -0.615455 | 6.418188  | -2.353570 |
|                                  | 6  | -4.464273 | 5.675418  | -2.223729 |
|                                  | 6  | -2.013022 | 6.391890  | -2.366540 |
|                                  | 6  | -3.194673 | 6.130567  | -2.323353 |
|                                  | 8  | 2.517239  | 6.563798  | -3.122811 |
|                                  | 8  | 0.124678  | 7.522436  | -2.627049 |
|                                  | 16 | 1.571621  | 6.728409  | -2.050837 |
| C <sub>18</sub> -SO <sub>3</sub> | 6  | -4.682579 | -0.758748 | -0.323598 |
|                                  | 6  | -3.335402 | -0.693833 | -0.298515 |
|                                  | 6  | -2.227042 | -0.202557 | -0.407864 |
|                                  | 6  | -1.231622 | 0.679305  | -0.634186 |
|                                  | 6  | -5.823072 | -0.359496 | -0.477757 |
|                                  | 6  | -6.749883 | 0.572960  | -0.781613 |
|                                  | 6  | -0.584809 | 1.672224  | -0.905571 |
|                                  | 6  | -7.163832 | 1.668250  | -1.117071 |
|                                  | 6  | -0.128667 | 2.896486  | -1.250230 |
|                                  | 6  | -7.048349 | 2.959202  | -1.491924 |
|                                  | 6  | 0.095890  | 4.042594  | -1.576907 |
|                                  | 6  | 0.165758  | 5.364992  | -1.962070 |
|                                  | 6  | -6.541554 | 4.024798  | -1.789572 |
|                                  | 6  | -5.610442 | 4.969464  | -2.035937 |
|                                  | 6  | -0.739826 | 6.330106  | -2.274024 |

|                                                                                           |    |           |           |           |
|-------------------------------------------------------------------------------------------|----|-----------|-----------|-----------|
|                                                                                           | 6  | -4.585410 | 5.604053  | -2.188403 |
|                                                                                           | 6  | -2.129824 | 6.306183  | -2.311877 |
|                                                                                           | 6  | -3.313253 | 6.051029  | -2.277978 |
|                                                                                           | 8  | 2.135146  | 6.402922  | -3.491502 |
|                                                                                           | 8  | 2.060604  | 7.097539  | -1.122971 |
|                                                                                           | 16 | 1.432622  | 6.574660  | -2.276666 |
|                                                                                           | 8  | 0.011197  | 7.439288  | -2.575223 |
| e) Internal coordinates of $\omega$ B97XD/Def2TZVPP optimized complexes with double ring. |    |           |           |           |
| (C <sub>18</sub> ) <sub>2</sub> -H <sub>2</sub>                                           | 6  | -5.374816 | -0.099284 | -0.334556 |
|                                                                                           | 6  | -4.239354 | -0.516068 | -0.171113 |
|                                                                                           | 6  | -2.895721 | -0.551221 | -0.166142 |
|                                                                                           | 6  | -1.739288 | -0.192400 | -0.319261 |
|                                                                                           | 6  | -6.380898 | 0.730649  | -0.658853 |
|                                                                                           | 6  | -6.962445 | 1.729882  | -1.050425 |
|                                                                                           | 6  | -0.690927 | 0.585960  | -0.637857 |
|                                                                                           | 6  | -7.163331 | 2.970700  | -1.525858 |
|                                                                                           | 6  | -0.057944 | 1.552610  | -1.031489 |
|                                                                                           | 6  | -6.923239 | 4.092243  | -1.943169 |
|                                                                                           | 6  | 0.206055  | 2.777985  | -1.516143 |
|                                                                                           | 6  | 0.020541  | 3.905395  | -1.945434 |
|                                                                                           | 6  | -6.227643 | 5.173776  | -2.333298 |
|                                                                                           | 6  | -5.276808 | 5.894122  | -2.592322 |
|                                                                                           | 6  | -0.622013 | 5.015854  | -2.345325 |
|                                                                                           | 6  | -4.003842 | 6.296135  | -2.746256 |
|                                                                                           | 6  | -1.535385 | 5.783338  | -2.603183 |
|                                                                                           | 6  | -2.783880 | 6.258208  | -2.749371 |
|                                                                                           | 6  | -4.408815 | 2.207309  | 2.353352  |
|                                                                                           | 6  | -3.065632 | 2.169312  | 2.346729  |
|                                                                                           | 6  | -1.908205 | 2.532754  | 2.211699  |
|                                                                                           | 6  | -0.857169 | 3.321544  | 1.930745  |
|                                                                                           | 6  | -5.544082 | 2.637034  | 2.226218  |
|                                                                                           | 6  | -6.549120 | 3.482607  | 1.943335  |
|                                                                                           | 6  | -0.217414 | 4.300013  | 1.579711  |
|                                                                                           | 6  | -7.131646 | 4.491036  | 1.578262  |
|                                                                                           | 6  | 0.053283  | 5.534123  | 1.121953  |
|                                                                                           | 6  | -7.326297 | 5.731943  | 1.100662  |
|                                                                                           | 6  | -0.124427 | 6.661397  | 0.688962  |
|                                                                                           | 6  | -0.765094 | 7.760460  | 0.256098  |
|                                                                                           | 6  | -7.081096 | 6.842130  | 0.656281  |
|                                                                                           | 6  | -6.378078 | 7.903186  | 0.225304  |
|                                                                                           | 6  | -1.679291 | 8.511097  | -0.045001 |
|                                                                                           | 6  | -5.422829 | 8.604283  | -0.067314 |
|                                                                                           | 6  | -2.929377 | 8.970440  | -0.224376 |
|                                                                                           | 6  | -4.149339 | 9.000424  | -0.232498 |
|                                                                                           | 1  | -4.327497 | 5.186426  | 0.247400  |
|                                                                                           | 1  | -3.637120 | 5.001977  | 0.455105  |
| (C <sub>18</sub> ) <sub>2</sub> -CO                                                       | 6  | -5.226929 | 0.136703  | -0.244967 |
|                                                                                           | 6  | -4.102857 | -0.317503 | -0.104582 |
|                                                                                           | 6  | -2.762095 | -0.401414 | -0.136592 |
|                                                                                           | 6  | -1.600098 | -0.081504 | -0.328136 |
|                                                                                           | 6  | -6.213774 | 0.993629  | -0.556943 |
|                                                                                           | 6  | -6.781468 | 1.999431  | -0.951564 |



(C<sub>18</sub>)<sub>2</sub>-CO<sub>2</sub>

---

|   |           |          |           |
|---|-----------|----------|-----------|
| 6 | -0.543176 | 0.662079 | -0.696671 |
| 6 | -6.971066 | 3.232564 | -1.450781 |
| 6 | 0.097066  | 1.604906 | -1.133180 |
| 6 | -6.731961 | 4.333917 | -1.919661 |
| 6 | 0.364300  | 2.811557 | -1.660531 |
| 6 | 0.189203  | 3.925209 | -2.128210 |
| 6 | -6.030885 | 5.379728 | -2.390230 |
| 6 | -5.071678 | 6.056740 | -2.724921 |
| 6 | -0.440479 | 5.030485 | -2.561172 |
| 6 | -3.791177 | 6.403778 | -2.941435 |
| 6 | -1.337005 | 5.810827 | -2.838755 |
| 6 | -2.573897 | 6.318161 | -2.975783 |
| 6 | -4.617920 | 2.181261 | 2.602947  |
| 6 | -3.277173 | 2.100014 | 2.554018  |
| 6 | -2.116577 | 2.420465 | 2.351926  |
| 6 | -1.062600 | 3.169882 | 1.985052  |
| 6 | -5.744206 | 2.636285 | 2.482395  |
| 6 | -6.741117 | 3.486585 | 2.183844  |
| 6 | -0.429713 | 4.124364 | 1.562230  |
| 6 | -7.317416 | 4.487348 | 1.788740  |
| 6 | -0.164095 | 5.339108 | 1.052210  |
| 6 | -7.517393 | 5.712819 | 1.275086  |
| 6 | -0.345601 | 6.456880 | 0.596740  |
| 6 | -0.977608 | 7.560952 | 0.163937  |
| 6 | -7.276334 | 6.807057 | 0.791273  |
| 6 | -6.576857 | 7.849345 | 0.311686  |
| 6 | -1.882734 | 8.328502 | -0.121345 |
| 6 | -5.619760 | 8.527190 | -0.025520 |
| 6 | -3.124121 | 8.820550 | -0.270812 |
| 6 | -4.342530 | 8.884269 | -0.241960 |
| 6 | -3.580962 | 4.269907 | -0.166614 |
| 8 | -3.838097 | 5.131806 | 0.506206  |

---

|   |           |           |           |
|---|-----------|-----------|-----------|
| 6 | -4.652229 | -0.223726 | -0.139669 |
| 6 | -3.458146 | -0.468320 | -0.079285 |
| 6 | -2.129379 | -0.309254 | -0.198413 |
| 6 | -1.058156 | 0.213477  | -0.459662 |
| 6 | -5.791164 | 0.447890  | -0.377454 |
| 6 | -6.548858 | 1.340412  | -0.722319 |
| 6 | -0.174860 | 1.134640  | -0.879564 |
| 6 | -6.971564 | 2.526473  | -1.191096 |
| 6 | 0.266353  | 2.176090  | -1.337982 |
| 6 | -6.949985 | 3.658648  | -1.646568 |
| 6 | 0.291330  | 3.415100  | -1.856760 |
| 6 | -0.095502 | 4.489968  | -2.286394 |
| 6 | -6.464586 | 4.817441  | -2.123624 |
| 6 | -5.665047 | 5.663377  | -2.491882 |
| 6 | -0.931690 | 5.477534  | -2.648193 |
| 6 | -4.485149 | 6.241451  | -2.775934 |
| 6 | -1.964170 | 6.097989  | -2.845855 |
| 6 | -3.277559 | 6.379589  | -2.890628 |
| 6 | -5.119909 | 2.378358  | 2.488057  |
| 6 | -3.929298 | 2.112330  | 2.533351  |

---

(C<sub>18</sub>)<sub>2</sub>-SO<sub>2</sub>

---

|       |           |           |           |
|-------|-----------|-----------|-----------|
| 6     | -2.599355 | 2.263536  | 2.409857  |
| 6     | -1.526107 | 2.786423  | 2.154491  |
| 6     | -6.257632 | 3.060881  | 2.274653  |
| 6     | -7.006519 | 3.965192  | 1.941355  |
| 6     | -0.638174 | 3.711484  | 1.751356  |
| 6     | -7.432839 | 5.148596  | 1.469216  |
| 6     | -0.200124 | 4.765275  | 1.317974  |
| 6     | -7.400414 | 6.272257  | 0.993951  |
| 6     | -0.161145 | 6.012861  | 0.820333  |
| 6     | -0.546155 | 7.090629  | 0.396374  |
| 6     | -6.914300 | 7.420695  | 0.494278  |
| 6     | -6.106377 | 8.251890  | 0.112805  |
| 6     | -1.370519 | 8.081332  | 0.017077  |
| 6     | -4.924772 | 8.825388  | -0.170178 |
| 6     | -2.404916 | 8.690344  | -0.203530 |
| 6     | -3.717338 | 8.969250  | -0.272325 |
| 8     | -3.372617 | 3.357803  | -0.859602 |
| 8     | -3.777210 | 5.167048  | 0.521759  |
| 6     | -3.574989 | 4.262535  | -0.169092 |
| <hr/> |           |           |           |
| 6     | -5.243707 | 0.443939  | -0.178258 |
| 6     | -4.004233 | -0.046688 | -0.009601 |
| 6     | -2.786254 | -0.114687 | -0.045227 |
| 6     | -1.504237 | 0.210413  | -0.280916 |
| 6     | -6.158117 | 1.187015  | -0.497440 |
| 6     | -6.792061 | 2.264554  | -0.991210 |
| 6     | -0.540021 | 0.857601  | -0.655705 |
| 6     | -6.975348 | 3.352414  | -1.514356 |
| 6     | 0.179053  | 1.861105  | -1.185039 |
| 6     | -6.690393 | 4.533137  | -2.091490 |
| 6     | 0.433013  | 2.928225  | -1.719744 |
| 6     | 0.241297  | 4.130365  | -2.287085 |
| 6     | -6.033425 | 5.451017  | -2.558676 |
| 6     | -4.969144 | 6.172396  | -2.953815 |
| 6     | -0.331473 | 5.115107  | -2.724479 |
| 6     | -3.801366 | 6.468568  | -3.153775 |
| 6     | -1.335648 | 5.944109  | -3.053853 |
| 6     | -2.460136 | 6.395938  | -3.198870 |
| 6     | -4.380697 | 2.527151  | 2.658477  |
| 6     | -3.162221 | 2.459658  | 2.600120  |
| 6     | -1.885030 | 2.795059  | 2.345042  |
| 6     | -0.935005 | 3.456339  | 1.956083  |
| 6     | -5.626093 | 3.013658  | 2.513741  |
| 6     | -6.521743 | 3.779170  | 2.193337  |
| 6     | -0.215185 | 4.460228  | 1.427087  |
| 6     | -7.143491 | 4.862682  | 1.697059  |
| 6     | 0.033721  | 5.531980  | 0.898964  |
| 6     | -7.294661 | 5.950890  | 1.164835  |
| 6     | -0.135179 | 6.738818  | 0.334283  |
| 6     | -0.700797 | 7.726225  | -0.106476 |
| 6     | -7.019140 | 7.125238  | 0.572775  |
| 6     | -6.368623 | 8.035940  | 0.085997  |
| 6     | -1.691639 | 8.565118  | -0.450286 |

---

(C<sub>18</sub>)<sub>2</sub>-SO<sub>3</sub>

---

|    |           |          |           |
|----|-----------|----------|-----------|
| 6  | -5.319431 | 8.764481 | -0.330291 |
| 6  | -2.819713 | 9.006366 | -0.598397 |
| 6  | -4.160321 | 9.076042 | -0.550458 |
| 8  | -2.915233 | 3.596719 | -1.062584 |
| 8  | -3.352922 | 5.579990 | 0.317894  |
| 16 | -3.794834 | 4.329414 | -0.209781 |

---

|    |           |          |           |
|----|-----------|----------|-----------|
| 6  | -5.997191 | 0.690783 | -0.805054 |
| 6  | -4.938868 | 0.206346 | -0.439041 |
| 6  | -3.613412 | 0.030851 | -0.291389 |
| 6  | -2.408161 | 0.191965 | -0.394744 |
| 6  | -6.846123 | 1.535571 | -1.417421 |
| 6  | -7.210261 | 2.487502 | -2.088018 |
| 6  | -1.213676 | 0.694653 | -0.755706 |
| 6  | -7.111488 | 3.592044 | -2.849287 |
| 6  | -0.366102 | 1.402884 | -1.274504 |
| 6  | -6.603491 | 4.507993 | -3.475228 |
| 6  | 0.196573  | 2.387074 | -1.998452 |
| 6  | 0.284130  | 3.371122 | -2.714421 |
| 6  | -5.667620 | 5.305463 | -4.020908 |
| 6  | -4.584510 | 5.765624 | -4.344248 |
| 6  | -0.117327 | 4.416532 | -3.459640 |
| 6  | -3.256162 | 5.932640 | -4.475918 |
| 6  | -0.886723 | 5.194784 | -3.998923 |
| 6  | -2.054310 | 5.751216 | -4.368337 |
| 6  | -3.714439 | 2.101358 | 2.659982  |
| 6  | -2.385825 | 2.264842 | 2.525381  |
| 6  | -1.301885 | 2.724387 | 2.202971  |
| 6  | -0.365203 | 3.522523 | 1.659489  |
| 6  | -4.915573 | 2.288434 | 2.553191  |
| 6  | -6.082736 | 2.848262 | 2.188402  |
| 6  | 0.138093  | 4.442469 | 1.035545  |
| 6  | -6.850340 | 3.628581 | 1.649827  |
| 6  | 0.235247  | 5.547878 | 0.275849  |
| 6  | -7.251679 | 4.673416 | 0.904405  |
| 6  | -0.130529 | 6.499246 | -0.394414 |
| 6  | -0.978963 | 7.341495 | -1.010172 |
| 6  | -7.168502 | 5.655505 | 0.185365  |
| 6  | -6.605892 | 6.636168 | -0.543193 |
| 6  | -2.034493 | 7.828240 | -1.381019 |
| 6  | -5.760194 | 7.342611 | -1.067820 |
| 6  | -3.359535 | 8.002764 | -1.533134 |
| 6  | -4.565329 | 7.843390 | -1.430813 |
| 8  | -2.369611 | 4.327475 | -1.280031 |
| 8  | -3.434404 | 5.223566 | 0.740645  |
| 16 | -3.473858 | 4.385127 | -0.398456 |
| 8  | -4.618219 | 3.597944 | -0.663907 |

---
